# Supplementary material
Source: MDPI journal article supplement (https://www.mdpi.com/1424-2818/16/1/40)

**The dancing *Marsenia*:  
The first record of a swimming velutinid mollusc**

Giulia Fassio<sup>1,2,\*</sup> & Johan Bas<sup>3</sup>

<sup>1</sup>Department of Biology and Biotechnologies “Charles Darwin”, Sapienza University of Rome, Rome, Italy

<sup>2</sup>Institut de Systématique, Évolution, Biodiversité (ISYEB), UMR 7205 (CNRS, EPHE, MNHN, UPMC), Muséum national d’Histoire naturelle, Sorbonne Universités, Paris, France

<sup>3</sup>BP 27502 - 98863 Noumea Cedex, New Caledonia

\*Corresponding author: [giulia.fassio@uniroma1.it](mailto:giulia.fassio@uniroma1.it)

## Supplementary Materials

**Table S1.** Sequences used for molecular analysis (including voucher codes, sampling localities, and GenBank accession numbers). \*new sequence.

| Species                          | Voucher            | Collection data                                                                                                              | COI       |
|----------------------------------|--------------------|------------------------------------------------------------------------------------------------------------------------------|-----------|
| <i>Marsenia</i> cf. <i>gemma</i> | MNHN-IM-2019-30080 | New Caledonia, Bayu Is., Saint Hélène, on the slope, ABC Poum 2023/ABC78, 20°07'34.1"S 164°04'43.4"E; <1 m depth; 22/06/2023 | OR933637* |
| <i>Marsenia</i> cf. <i>gemma</i> | MNHN-IM-2013-3209  | Papua New Guinea, west of Sek Is., PAPUA NIUGINI/PD28, 05°04.8' S, 145°50.7' E, 1–4 m depth                                  | ON524306  |
| <i>Marsenia</i> cf. <i>gemma</i> | MNHN-IM-2019-8253  | New Caledonia, KOUMAC 2.3/KD546, 20°41' S, 164°17.1' E, 6 m depth                                                            | ON524307  |
| <i>Marsenia</i> cf. <i>gemma</i> | MNHN-IM-2013-5160  | Papua New Guinea, south of Panab Is., PAPUA NIUGINI/PD53, 05°10.3' S, 145°48.5' E, 2–10 m depth                              | ON524308  |
| <i>Marsenia</i> cf. <i>gemma</i> | MNHN-IM-2019-9052  | New Caledonia, Kendec Is., KOUMAC 2.3/KM724, 20°40.1' S, 164°15.4' E, 0 m depth                                              | ON524309  |
| <i>Marsenia</i> cf. <i>gemma</i> | MNHN-IM-2019-3139  | New Caledonia, KOUMAC 2.3/KD505, 20°34.3' S, 164°15.2' E, 2–4 m depth                                                        | ON524310  |
| <i>Marsenia</i> cf. <i>gemma</i> | MNHN-IM-2009-16139 | Madagascar, Phare Flacourt, ATIMO VATAE/TB13, 25°01.5' S, 47°00.0' E, 2 m depth                                              | MK047754  |
| <i>Marsenia</i> cf. <i>gemma</i> | MNHN-IM-2009-16130 | Madagascar, off Monseigneur Bay, ATIMO VATAE/TB05, 25°02.2' S, 47°00.4' E, 23 m depth                                        | MK047755  |
| <i>Marsenia</i> cf. <i>gemma</i> | IOP-039            | Saudi Arabia, Read Sea, ARMS, 22.18 N , 38.57 E, 10 m depth                                                                  | MH339301  |
| <i>Marsenia</i> cf. <i>gemma</i> | MNHN-IM-2009-16141 | Madagascar, Lavanono sector, ATIMO VATAE/BB03, 25°26.4' S, 44°56.1' E, 14 m depth                                            | MK047756  |
| <i>Marsenia herberti</i>         | IOP-0560           | Saudi Arabia, Read Sea, ARMS, 22.18 N , 38.57 E, 10 m depth                                                                  | MH339352  |
| <i>Marsenia herberti</i>         | BJLinnSoc-4        | Tanzania, Dar es Salaam                                                                                                      | AY161616  |
| <i>Marsenia herberti</i>         | UF IZ 508461       | USA, Hawaii, Oahu, Kaneohe Bay, north of Kapapa Is., 21° 30.094' N, 157° 47.786' W                                           | MW278536  |
| <i>Marsenia herberti</i>         | MNHN-IM-2013-79992 | Philippines, Panglao, Panglao 2004/B22 BC1176/SC119, 09°29,4'N 123°56' E, 15-20 m depth                                      | MK047752  |
| <i>Marsenia herberti</i>         | MNHN-IM-2019-8219  | New Caledonia, Grand Récif of Koumac, KOUMAC 2.1/KA11/ARMS 11A, 20°40.1' S, 164°11.4' E, 19 m depth                          | ON524324  |

|                              |                    |                                                                                                     |          |
|------------------------------|--------------------|-----------------------------------------------------------------------------------------------------|----------|
| <i>Lamellaria diegoensis</i> | LACM 182857        | USA, Oregon, Gold Beach, Four Sisters Rock, 42° 35.564' N, 124° 24.106' W                           | ON524249 |
| <i>Lamellaria fella</i>      | BAU 2845           | Martinique, Anse Noire                                                                              | ON524253 |
| <i>Lamellaria mopsicolor</i> | MNHN-IM-2013-73086 | Martinique, Fort-de-France Bay, Marettes Cove, MADIBENTHOS/AR471, 14°33' N, 61°03.7' W, 1–4 m depth | ON524256 |

**Table S2.** Pairwise COI genetic distances (%) between velutinid specimens, calculated with MEGA11 (K2P, pairwise deletion).

|                                              | MNHN_IM_2019_3008_0 | MNHN_I_M_2013_3209 | MNHN_IM_2009_1613_0 | MNHN_IM_2009_1613_9 | MNHN_I_M_2019_9052 | MNHN_I_M_2019_3139 | MNHN_I_M_2019_8253 | MNHN_IM_2009_1614_1 | IOP_03_9 | MNHN_I_M_2013_5160 | IOP_056_0 | BJLinnSoc_4 | UF_IZ_50846_1 | MNHN_IM_2013_7999_2 | MNHN_I_M_2019_8219 | MNHN_IM_2013_7308_6 | BAU_284_5 | LACM_18285_7 |
|----------------------------------------------|---------------------|--------------------|---------------------|---------------------|--------------------|--------------------|--------------------|---------------------|----------|--------------------|-----------|-------------|---------------|---------------------|--------------------|---------------------|-----------|--------------|
| MNHN_IM_2019_30080_NC_Marsenia               | 0                   |                    |                     |                     |                    |                    |                    |                     |          |                    |           |             |               |                     |                    |                     |           |              |
| MNHN_IM_2013_3209_PG_Marsenia_cf_gemma       | 0.66                | 0                  |                     |                     |                    |                    |                    |                     |          |                    |           |             |               |                     |                    |                     |           |              |
| MNHN_IM_2009_16130_MG_Marsenia_cf_gemma      | 0.82                | 0.83               | 0                   |                     |                    |                    |                    |                     |          |                    |           |             |               |                     |                    |                     |           |              |
| MNHN_IM_2009_16139_MG_Marsenia_cf_gemma      | 0.99                | 1                  | 0.16                | 0                   |                    |                    |                    |                     |          |                    |           |             |               |                     |                    |                     |           |              |
| MNHN_IM_2019_9052_NC_Marsenia_cf_gemma       | 0.82                | 0.83               | 0.66                | 0.82                | 0                  |                    |                    |                     |          |                    |           |             |               |                     |                    |                     |           |              |
| MNHN_IM_2019_3139_NC_Marsenia_cf_gemma       | 0.66                | 0.66               | 0.16                | 0.33                | 0.49               | 0                  |                    |                     |          |                    |           |             |               |                     |                    |                     |           |              |
| MNHN_IM_2019_8253_NC_Marsenia_cf_gemma       | 0.99                | 1                  | 0.49                | 0.66                | 0.82               | 0.33               | 0                  |                     |          |                    |           |             |               |                     |                    |                     |           |              |
| MNHN_IM_2009_16141_MG_Marsenia_cf_gemma      | 0.49                | 0.83               | 0.33                | 0.49                | 0.66               | 0.16               | 0.49               | 0                   |          |                    |           |             |               |                     |                    |                     |           |              |
| IOP_039_Mollusca_SA_RedSea_Marsenia_cf_gemma | 0.49                | 0.83               | 0.33                | 0.49                | 0.66               | 0.16               | 0.49               | 0                   | 0        |                    |           |             |               |                     |                    |                     |           |              |
| MNHN_IM_2013_5160_PG_Marsenia_cf_gemma       | 0.66                | 0.66               | 0.49                | 0.66                | 0.49               | 0.33               | 0.66               | 0.49                | 0.49     | 0                  |           |             |               |                     |                    |                     |           |              |
| IOP_0560_SA_RedSea_Marsenia_herberti         | 8.91                | 8.2                | 8.53                | 8.34                | 9.29               | 8.72               | 8.72               | 8.72                | 8.72     | 9.1                | 0         |             |               |                     |                    |                     |           |              |
| BJLinnSoc_4_TZ_ZNZ_Marsenia_herberti         | 9.66                | 8.95               | 9.66                | 9.47                | 9.66               | 9.47               | 9.47               | 9.47                | 9.47     | 9.85               | 3.36      | 0           |               |                     |                    |                     |           |              |
| UF_IZ_508461_US_HI_Marsenia_herberti         | 9.1                 | 8.4                | 8.72                | 8.54                | 9.49               | 8.91               | 8.91               | 8.91                | 8.91     | 9.3                | 2.51      | 2.85        | 0             |                     |                    |                     |           |              |
| MNHN_IM_2013_79992_PH_Marsenia_herberti      | 9.49                | 8.78               | 9.1                 | 8.91                | 9.87               | 9.3                | 9.3                | 9.3                 | 9.3      | 9.68               | 2.51      | 3.2         | 0.66          | 0                   |                    |                     |           |              |
| MNHN_IM_2019_8219_NC_Marsenia_herberti       | 9.3                 | 8.59               | 8.91                | 8.72                | 9.68               | 9.1                | 9.1                | 9.1                 | 9.1      | 9.49               | 2.34      | 3.02        | 0.49          | 0.16                | 0                  |                     |           |              |
| MNHN_IM_2013_73086_MQ_Lamellaria_mopsicolor  | 16.2                | 16.5               | 16.2                | 16.41               | 16.41              | 16.41              | 16.41              | 16.41               | 16.41    | 16.82              | 17.68     | 18.53       | 17.48         | 18.12               | 17.9               | 0                   |           |              |
| BAU_2845_MQ_Lamellaria_fella                 | 18.91               | 19.47              | 19.35               | 19.13               | 19.13              | 19.57              | 19.13              | 19.57               | 19.57    | 19.57              | 20.91     | 20.9        | 19.81         | 20.7                | 20.48              | 10.47               | 0         |              |
| LACM_182857_US_OR_Lamellaria_diegoensis      | 17.86               | 17.55              | 17.44               | 17.23               | 18.08              | 17.65              | 17.23              | 17.65               | 17.65    | 18.08              | 18.09     | 17.86       | 18.1          | 18.75               | 18.53              | 14.08               | 14.53     | 0            |

**Figure S1.** Bayesian Inference tree of the COI velutinid dataset, at node posterior probability values (considered supported when >0.95)

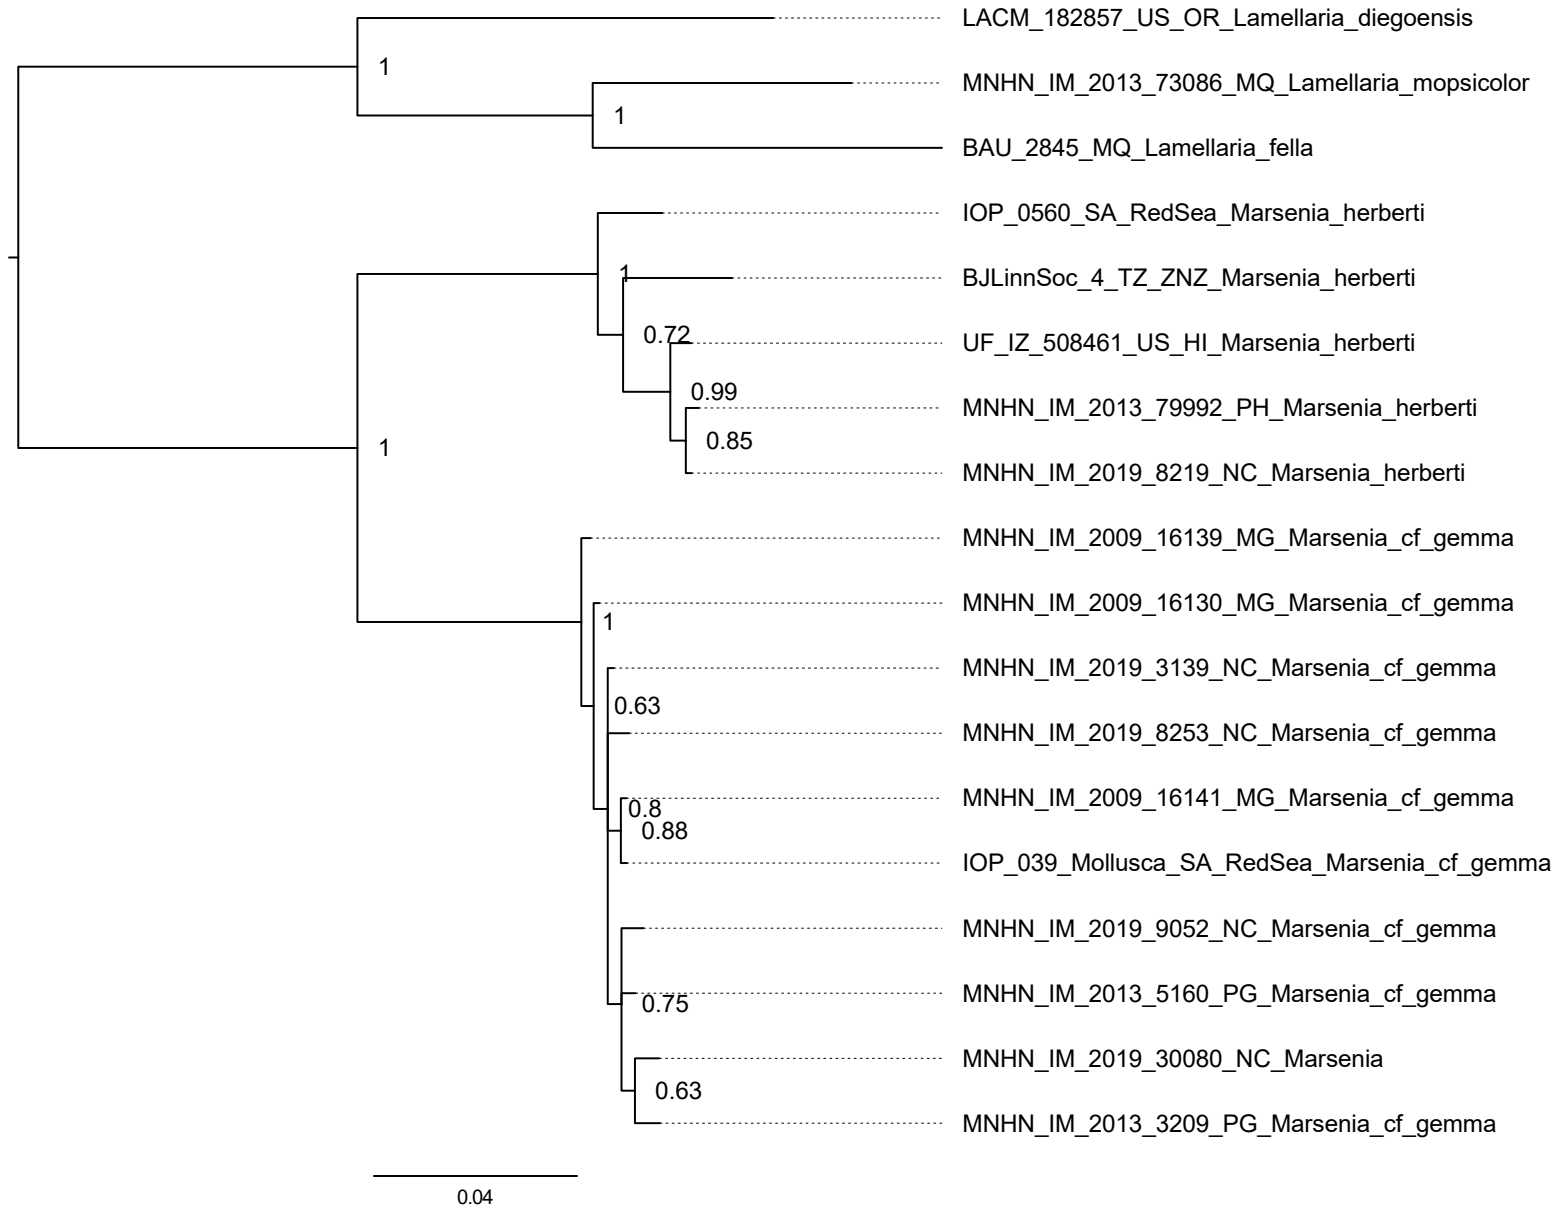

Supplement: s1 [file s1]
